1 **Effects of temperature and humidity on the spread of COVID-19: A systematic**  
2 **review**

3 Paulo Mecnas<sup>1¶</sup>, Renata Travassos da Rosa Moreira Bastos<sup>1¶</sup>, Antonio Carlos Rosário  
4 Vallinoto<sup>2</sup>, David Normando<sup>1</sup>

5

6 <sup>1</sup> Health Sciences Institute, Department of Orthodontics, Federal University of Pará,  
7 Belém, Pará, Brazil.

8 <sup>2</sup> Institute of Biological Sciences, Virology Laboratory, Federal University of Pará,  
9 Belém, Pará, Brazil.

10

11 **ABSTRACT**

12 **Background:** Faced with the global pandemic of COVID-19, declared by World Health  
13 Organization (WHO) on March 11<sup>th</sup> 2020, and the need to better understand the seasonal  
14 behavior of the virus, our team conducted this systematic review to describe current  
15 knowledge about the emergence and replicability of the virus and its correlation with  
16 different weather factors such as temperature and relative humidity.

17 **Methods:** The review was registered with the PROSPERO database. The electronic  
18 databases PubMed, Scopus, Web of Science, Cochrane Library, LILACS, OpenGrey and  
19 Google Scholar were examined with the searches restricted to the years 2019 and 2020.  
20 Risk of bias assessment was performed using the Joanna Briggs Institute (JBI) Critical  
21 Appraisal Checklist tool. The GRADE tool was used to assess the quality of the evidence.

22 **Results:** The initial screening identified 517 articles. After examination of the full texts,  
23 seventeen studies met the review's eligibility criteria. Great homogeneity was observed  
24 in the findings regarding the effect of temperature and humidity on the seasonal viability  
25 and transmissibility of COVID-19. Cold and dry conditions were potentiating factors on  
26 the spread of the virus. After quality assessment, four studies had a high risk of bias and  
27 thirteen studies were scored as moderate risk of bias. The certainty of evidence was  
28 graded as low for both outcomes evaluated.

29 **Conclusion:** Considering the existing scientific evidence, warm and wet climates seem  
30 to reduce the spread of COVID-19. The certainty of the evidence generated was graded  
31 as low. However, these variables alone could not explain most of the variability in disease  
32 transmission.

33

**NOTE:** This preprint reports new research that has not been certified by peer review and should not be used to guide clinical practice.

34 **Keyword:** Coronavirus. SARS-CoV-2. COVID-19. Public Health. Temperature.  
35 Humidity.

36

37

## 38 **Introduction**

39 Respiratory tract infections are the most common infections worldwide,  
40 representing a source of significant morbidity and a considerable economic burden to  
41 health care.[1] The coronaviruses, *Orthocoronaviridae* sub-family, are so called for their  
42 crown-like spikes on the viral surface. They are classified into four main genus sub-  
43 groups known as *Alphacoronavirus*, *Betacoronavirus*, *Gammacoronavirus*,  
44 *Deltacoronavirus*, and are able to infect human beings with a common flu.[2,3]

45 A new epidemic of Severe Acute Respiratory Syndrome (SARS) Coronavirus has  
46 emerged since December 2019, namely SARS-CoV-2 or COVID-19, in Wuhan, the  
47 capital of Hubei Province, China. An outbreak of atypical pneumonia named COVID-19  
48 caused by this virus has been reported,[4,5] and the pattern of human-to-human  
49 transmissibility of the virus has occurred nationally and internationally.[6,7]

50 The etiological agents have been confirmed as a new subset of coronaviruses.[8]  
51 Spread of SARS-CoV-2, like other respiratory viruses, namely its predecessor SARS-  
52 CoV, can be due to easy aerial transmissions of respiratory droplets, exposing the virus  
53 to external environmental conditions.[9] This epidemic has caused a collapse on health  
54 care services and economies of affected countries, and the overall mortality rate was  
55 estimated to be 4.7%, but in elderly patients, aged 60 or above, it can increase to up  
56 14.8%.[10] A notable feature of SARS-CoV-2 is its predilection for transmission in the  
57 health care setting and to close family and social contacts by different manners, such as  
58 droplets, close direct or indirect contact, but the relative importance of these routes of  
59 transmission is still unclear.[11] The transmission can be affected by a number of factors,  
60 including population density, migratory flow, host immunity, medical care quality and,  
61 presumably, climate conditions (such as temperature and humidity).[12,13]

62 Limited studies have investigated climate parameters as important factors that  
63 could influence the SARS-CoV-2 spread. The seasonal nature in the outbreaks of  
64 respiratory virus infections is a common phenomenon, with peaks often occurring in low  
65 temperatures, during the winter months.[1] The coronavirus can retain its infectivity up  
66 to 2 weeks in a low temperature and low humidity environment, which might facilitate

67 the virus transmission in a community located in a subtropical climate.[11] The  
68 mechanism underlying these patterns of climate determination that lead to infection and  
69 possible disease transmission is associated with the ability of the virus to survive external  
70 environmental conditions before staying in a host.[9] Many etiological factors such as  
71 changes in host physiological susceptibility, immune system function, social behavior,  
72 and weather conditions have been suggested in this context.[14]

73 It is supposed that high temperature and humidity, together, have a combined  
74 effect on inactivation of coronaviruses while the opposite weather condition can support  
75 prolonged survival time of the virus on surfaces and facilitate the transmission and  
76 susceptibility of the viral agent.[11] This combination may trigger an impairment of the  
77 local and systemic antiviral defense mechanisms, leading to increased host susceptibility  
78 to the respiratory viruses in winter.[15]

79 Nevertheless, there is still divergence in the literature about the effects of  
80 temperature and humidity on the viability and transmissibility of the coronavirus infection  
81 that appeared in 2019. Faced with the global pandemic of COVID-19, declared by World  
82 Health Organization (WHO) on March 11<sup>th</sup> 2020,[16] and the need to better understand  
83 the seasonal behavior of the virus, our team conducted this systematic review to describe  
84 current knowledge about the emergence and replicability of the virus and its correlation  
85 with different weather factors such as temperature and relative humidity. This information  
86 could be useful to develop and implement an efficient health information system with  
87 public interventions to control the incidence, and to curb the spread, of COVID-19 in the  
88 world.

89

## 90 **Methods**

### 91 *1.1. Protocol and registration*

92 This systematic review was registered with the PROSPERO database  
93 (CRD42020176909), and performed according with the PRISMA (Preferred Reporting  
94 Items for Systematic Reviews and Meta-Analyses) guidelines (S1 file).[17]

### 95 *1.2. Eligibility criteria*

96 Manuscripts that evaluated the effects of different climatic conditions of  
97 temperature and/or humidity on the spread of COVID-19 were included. The search  
98 strategy was defined based on the PECOS format as follows:

99 Population (P): Humans diagnosed with COVID-19;

100 Exposition (E): Different weather conditions: humidity, temperature;







Infestation") OR TÓPICO: ("Infestation and Infection") OR TÓPICO: ("Infections and Infestations") OR TÓPICO: ("Infestations and Infections") OR TÓPICO: (Infection) OR TÓPICO: (Incidence) OR TÓPICO: (Incidences) OR TÓPICO: (Prevalence) OR TÓPICO: (Prevalences) OR TÓPICO: ("Disease Transmission, Infectious") OR TÓPICO: ("Pathogen Transmission") OR TÓPICO: ("Transmission, Pathogen") OR TÓPICO: ("Infectious Disease Transmission") OR TÓPICO: ("Transmission, Infectious Disease") OR TÓPICO: ("Transmission of Infectious Disease") OR TÓPICO: ("Infection Transmission") OR TÓPICO: ("Transmission, Infection") OR TÓPICO: ("Communicable Disease Transmission") OR TÓPICO: ("Disease Transmission, Communicable") OR TÓPICO: ("Transmission, Communicable Disease") OR TÓPICO: ("Autochthonous Transmission") OR TÓPICO: ("Autochthonous Transmissions") OR TÓPICO: ("Transmission, Autochthonous") OR TÓPICO: ("Transmissions, Autochthonous") OR TÓPICO: ("Infectious Disease Transmission, Horizontal") OR TÓPICO: ("Pathogen Transmission, Horizontal") OR TÓPICO: ("Horizontal Transmission of Infectious Disease") OR TÓPICO: ("Horizontal Transmission of Infection") OR TÓPICO: ("Infection Horizontal Transmission") OR TÓPICO: ("Infection Transmission, Horizontal") OR TÓPICO: (Viability) OR TÓPICO: (Transmissibility) OR TÓPICO: (Spread) OR TÓPICO: (Propagation Spreading) OR TÓPICO: (Spreading)

- #1 ("COVID-19"):ti,ab,kw OR ("2019 novel coronavirus infection"):ti,ab,kw OR (COVID19):ti,ab,kw OR ("coronavirus disease 2019"):ti,ab,kw OR ("coronavirus disease-19"):ti,ab,kw (Word variations have been searched)
- #2 ("2019-nCoV disease"):ti,ab,kw OR ("2019 novel coronavirus disease"):ti,ab,kw OR ("2019-nCoV infection"):ti,ab,kw OR (Coronavirus):ti,ab,kw OR (Coronaviruses):ti,ab,kw (Word variations have been searched)
- #3 (Betacoronavirus):ti,ab,kw OR (Betacoronaviruses):ti,ab,kw OR ("SARS Virus"):ti,ab,kw OR ("Severe Acute Respiratory Syndrome Virus"):ti,ab,kw OR ("SARS-Related Coronavirus"):ti,ab,kw (Word variations have been searched)
- #4 ("Coronavirus, SARS-Related"):ti,ab,kw OR ("SARS Related Coronavirus"):ti,ab,kw OR ("SARS-CoV"):ti,ab,kw OR ("Urbani SARS-Associated Coronavirus"):ti,ab,kw OR ("Coronavirus, Urbani SARS-Associated"):ti,ab,kw (Word variations have been searched)
- #5 ("SARS-Associated Coronavirus, Urbani"):ti,ab,kw OR ("Urbani SARS Associated Coronavirus"):ti,ab,kw OR ("SARS Coronavirus"):ti,ab,kw OR ("Coronavirus, SARS"):ti,ab,kw OR ("Severe acute respiratory syndrome-related coronavirus"):ti,ab,kw (Word variations have been searched)
- #6 ("Severe acute respiratory syndrome related coronavirus"):ti,ab,kw OR ("SARS-Associated Coronavirus"):ti,ab,kw OR ("Coronavirus, SARS-Associated"):ti,ab,kw OR ("SARS Associated Coronavirus"):ti,ab,kw OR ("severe acute respiratory syndrome coronavirus 2"):ti,ab,kw (Word variations have been searched)
- #7 ("Wuhan coronavirus"):ti,ab,kw OR ("Wuhan seafood market pneumonia virus"):ti,ab,kw OR ("COVID19 virus"):ti,ab,kw OR ("COVID-19 virus"):ti,ab,kw OR ("coronavirus disease 2019 virus"):ti,ab,kw (Word variations have been searched)
- #8 ("SARS-CoV-2"):ti,ab,kw OR (SARS2):ti,ab,kw OR ("2019-nCoV"):ti,ab,kw OR ("2019 novel coronavirus"):ti,ab,kw OR ("Coronavirus Infections"):ti,ab,kw (Word variations have been searched)
- #9 ("Coronavirus Infection"):ti,ab,kw OR ("Infection, Coronavirus"):ti,ab,kw OR ("Infections, Coronavirus"):ti,ab,kw OR ("2019-nCoV"):ti,ab,kw (Word variations have been searched)
- #10 ("New coronavirus"):ti,ab,kw OR ("2019-novel-coronavirus"):ti,ab,kw (Word variations have been searched)
- #11 #1 OR #2 OR #3 OR #4 OR #5 OR #6 OR #7 OR #8 OR #9 OR #10
- #12 (Weather):ti,ab,kw OR (Fog):ti,ab,kw OR (Fogs):ti,ab,kw OR (Climate):ti,ab,kw OR (Climates):ti,ab,kw (Word variations have been searched)
- #13 (Humidity):ti,ab,kw OR (Humidities):ti,ab,kw OR (Temperature):ti,ab,kw OR (Temperatures):ti,ab,kw OR (Seasons):ti,ab,kw (Word variations have been searched)
- #14 (Season):ti,ab,kw OR ("Seasonal Variation"):ti,ab,kw OR ("Seasonal Variations"):ti,ab,kw OR ("Variation, Seasonal"):ti,ab,kw OR ("Variations, Seasonal"):ti,ab,kw (Word variations have been searched)
- #15 (Altitude):ti,ab,kw OR (Altitudes):ti,ab,kw OR (Seasonal):ti,ab,kw OR (Seasonality):ti,ab,kw OR (Latitude):ti,ab,kw (Word variations have been searched)
- #16 #12 OR #13 OR #14 OR #15
- #17 ("Microbial Viability"):ti,ab,kw OR ("Viability, Microbial"):ti,ab,kw OR ("Virus Viability"):ti,ab,kw OR ("Viability, Virus"):ti,ab,kw OR (Transmission):ti,ab,kw (Word variations have been searched)
- #18 (Infections):ti,ab,kw OR ("Infection and Infestation"):ti,ab,kw OR ("Infestation and Infection"):ti,ab,kw OR ("Infections and Infestations"):ti,ab,kw OR ("Infestations and Infections"):ti,ab,kw (Word variations have been searched)
- #19 (Infection):ti,ab,kw OR (Incidence):ti,ab,kw OR (Incidences):ti,ab,kw OR (Prevalence):ti,ab,kw OR (Prevalences):ti,ab,kw (Word variations have been searched)
- #20 ("Disease Transmission, Infectious"):ti,ab,kw OR ("Pathogen Transmission"):ti,ab,kw OR ("Transmission, Pathogen"):ti,ab,kw OR ("Infectious Disease Transmission"):ti,ab,kw OR ("Transmission, Infectious Disease"):ti,ab,kw (Word variations have been searched)
- #21 ("Transmission of Infectious Disease"):ti,ab,kw OR ("Infection Transmission"):ti,ab,kw OR ("Transmission, Infection"):ti,ab,kw OR ("Communicable Disease Transmission"):ti,ab,kw OR ("Disease Transmission, Communicable"):ti,ab,kw (Word variations have been searched)
- #22 ("Transmission, Communicable Disease"):ti,ab,kw OR ("Autochthonous Transmission"):ti,ab,kw OR ("Autochthonous Transmissions"):ti,ab,kw OR ("Transmission, Autochthonous"):ti,ab,kw OR ("Transmissions, Autochthonous"):ti,ab,kw (Word variations have been searched)
- #23 ("Infectious Disease Transmission, Horizontal"):ti,ab,kw OR ("Pathogen Transmission, Horizontal"):ti,ab,kw OR ("Horizontal Transmission of Infectious Disease"):ti,ab,kw OR ("Horizontal Transmission of Infection"):ti,ab,kw OR ("Infection Horizontal Transmission"):ti,ab,kw (Word variations have been searched)
- #24 ("Infection Transmission, Horizontal"):ti,ab,kw OR (Viability):ti,ab,kw OR (Transmissibility):ti,ab,kw (Word variations have been searched)
- #25 (Spread):ti,ab,kw OR (Propagation):ti,ab,kw OR (Spreading):ti,ab,kw (Word variations have been searched)
- #26 #17 OR #18 OR #19 OR #20 OR #21 OR #22 OR #23 OR #24 OR #25
- #27 #11 AND #16 AND #26

Cochrane

2

(tw:(tw:(COVID-19)) OR (tw:(2019 novel coronavirus infection)) OR (tw:(COVID19)) OR (tw:(coronavirus disease 2019)) OR (tw:(coronavirus disease-19)) OR (tw:(2019-nCoV disease)) OR (tw:(2019 novel coronavirus disease)) OR (tw:(2019-nCoV infection)) OR (tw:(Coronavirus)) OR (tw:(Coronaviruses)) OR (tw:(Betacoronavirus)) OR (tw:(Betacoronaviruses)) OR (tw:(SARS Virus)) OR (tw:(Severe Acute Respiratory Syndrome Virus)) OR (tw:(SARS-Related Coronavirus)) OR (tw:(Coronavirus, SARS-Related)) OR (tw:(SARS Related Coronavirus)) OR (tw:(SARS-CoV)) OR (tw:(Urbani SARS-Associated Coronavirus)) OR (tw:(Coronavirus, Urbani SARS-Associated)) OR (tw:(SARS-Associated Coronavirus, Urbani)) OR (tw:(Urbani SARS Associated Coronavirus)) OR (tw:(SARS Coronavirus)) OR (tw:(Coronavirus, SARS)) OR (tw:(Severe acute respiratory syndrome-related coronavirus)) OR (tw:(Severe acute respiratory syndrome related coronavirus)) OR (tw:(SARS-Associated Coronavirus)) OR (tw:(Coronavirus, SARS-Associated)) OR (tw:(SARS Associated Coronavirus)) OR (tw:(severe acute respiratory syndrome coronavirus 2)) OR (tw:(Wuhan coronavirus)) OR (tw:(Wuhan seafood market pneumonia virus)) OR (tw:(COVID19 virus)) OR (tw:(COVID-19 virus)) OR (tw:(coronavirus disease 2019 virus)) OR (tw:(SARS-CoV-2)) OR (tw:(SARS2)) OR (tw:(2019-nCoV)) OR (tw:(2019 novel coronavirus)) OR (tw:(Coronavirus Infections)) OR (tw:(Coronavirus Infection)) OR (tw:(Infection, Coronavirus)) OR (tw:(Infections, Coronavirus)) OR (tw:(2019-nCoV)) OR (tw:(New coronavirus)) OR (tw:(2019-novel-coronavirus))) AND (tw:(tw:(Weather)) OR (tw:(Fog)) OR (tw:(Fogs)) OR (tw:(Climate)) OR (tw:(Climates)) OR (tw:(Humidity)) OR (tw:(Humidities)) OR (tw:(Temperature)) OR (tw:(Temperatures)) OR (tw:(Seasons)) OR (tw:(Season)) OR (tw:(Seasonal Variation)) OR (tw:(Seasonal Variations)) OR (tw:(Variation, Seasonal)) OR (tw:(Variations, Seasonal)) OR (tw:(Altitude)) OR (tw:(Altitudes)) OR (tw:(Seasonal)) OR (tw:(Seasonality)) OR (tw:(Latitude))) AND (tw:(tw:(Microbial Viability)) OR (tw:(Viability, Microbial)) OR (tw:(Virus Viability)) OR (tw:(Viability, Virus)) OR (tw:(Transmission)) OR (tw:(Infections)) OR (tw:(Infection and Infestation)) OR (tw:(Infections and Infestations)) OR (tw:(Infestations and Infections)) OR (tw:(Infection)) OR (tw:(Incidence)) OR (tw:(Incidences)) OR (tw:(Prevalence)) OR (tw:(Prevalences)) OR (tw:(Disease Transmission, Infectious)) OR (tw:(Pathogen Transmission)) OR (tw:(Transmission, Pathogen)) OR (tw:(Infectious Disease Transmission)) OR (tw:(Transmission, Infectious Disease)) OR (tw:(Transmission of Infectious Disease)) OR

LILACS

4

(tw:(Infection Transmission)) OR (tw:(Transmission, Infection)) OR (tw:(Communicable Disease Transmission)) OR (tw:(Disease Transmission, Communicable)) OR (tw:(Transmission, Communicable Disease)) OR (tw:(Autochthonous Transmission)) OR (tw:(Autochthonous Transmissions)) OR (tw:(Transmission, Autochthonous)) OR (tw:(Transmissions, Autochthonous)) OR (tw:(Infectious Disease Transmission, Horizontal)) OR (tw:(Pathogen Transmission, Horizontal)) OR (tw:(Horizontal Transmission of Infectious Disease)) OR (tw:(Horizontal Transmission of Infection)) OR (tw:(Infection Horizontal Transmission)) OR (tw:(Infection Transmission, Horizontal)) OR (tw:(Viability)) OR (tw:(Transmissibility)) OR (tw:(Spread)) OR (tw:(Propagation)) OR (tw:(Spreading)))

|                |                                    |     |
|----------------|------------------------------------|-----|
| OpenGrey       | coronavirus AND spread             | 0   |
| Google Scholar | coronavirus AND weather AND spread | 325 |

---

123

124 The citations were saved in a reference manager (EndNote, x9 version, Clarivate  
125 Analytics, Philadelphia, PA, USA). After removing duplicates, titles and abstracts were  
126 analyzed according to the eligibility criteria. The selected articles were evaluated by full  
127 text, and a final selection was conducted.

### 128 *1.5. Data extraction*

129 Two authors collected the data independently (XX and XXX), extracting the  
130 following items: authors, year, location and type of study; date of COVID-19 data  
131 collection; date of meteorological data collection; sample countries; weather variables;  
132 COVID-19 data sources; meteorological data sources; statistical analysis and main  
133 results. Meta-analysis was planned if there was relative homogeneity of the data and the  
134 methods for obtaining it, for each selected article.

### 135 *1.6. Assessment of risk of bias*

136 All the included studies were assessed for methodological rigor using the Joanna  
137 Briggs Institute (JBI) Critical Appraisal Checklist tool.[18] The checklist for cross-  
138 sectional studies uses eight criteria. The evaluation content includes: the criteria for  
139 inclusion in the sample; the study subjects and the setting described; measurement of the  
140 exposure; the objective, standard criteria used for measurement of the condition;  
141 identifying the confounding factors; the strategies to deal with confounding factors;  
142 measurement of the outcomes; and the statistical analysis used. Each component was  
143 rated as “yes”, “no”, “unclear”, or “not applicable”. With 1-3 “yes” scores, the risk of  
144 bias classification is high, 4-6 “yes” scores are moderate and 7-8 are low risk of bias. The  
145 information about the studies was extracted, synthesized from the data, and reflected in  
146 the results and conclusions of this systematic review. Two authors (XX and XXX)  
147 independently evaluated the quality of each study, and disagreements were resolved by  
148 discussion within the review team.

### 149 *1.7. Certainty of evidence*

150 The included articles were given a narrative grade related to the outcomes assessed  
151 in this review (effects of temperature and humidity on spread of COVID-19) according

152 to the GRADE tool (Grading of Recommendation, Assessment, Development, and  
153 Evaluation) (GRADEpro Guideline Development Tool, available online at  
154 [grade.pro.org](http://grade.pro.org)).[19] This tool considers five aspects for rating the level of evidence: design,  
155 risk of bias, consistency, directness, and precision of the studies. The level of evidence  
156 was classified as high, moderate, low or very low. The outcomes evaluated were  
157 “Association between temperature and spread rate of COVID-19” and “Association  
158 between humidity and spread rate of COVID-19”.

159

## 160 **Results**

### 161 *Study Selection*

162 The initial searches identified 517 articles: 78 from PubMed, 37 from Scopus, 71  
163 from Web of Science, 2 from Cochrane Library, 4 from LILACS, 0 from OpenGrey and  
164 325 from Google Scholar. After exclusion of duplicates, 434 studies remained. After  
165 reading the titles and abstracts, 26 remaining articles were evaluated by full text and 9  
166 were excluded. The reasons for exclusion are shown in Table 2. Seventeen studies were  
167 included and selected for qualitative analysis of risk of bias (Fig 1).

**Table 2.** List of excluded studies with reasons for exclusion.

| <b>Reference</b>       | <b>Reason for exclusion</b>                                    |
|------------------------|----------------------------------------------------------------|
| Boulos et al. (2020)   | Editorial article.                                             |
| Cai et al. (2020)      | The article evaluated the mortality rate of COVID-19.          |
| Jackson et al. (2020)  | The article did not evaluate COVID-19.                         |
| Khalifa et al. (2019)  | The article did not evaluate COVID-19.                         |
| Ma et al. (2020)       | The article evaluated daily mortality rate of COVID-19.        |
| Moriyama et al. (2020) | Literature review.                                             |
| Neher et al. (2020)    | The article did not report temperature and humidity variables. |
| Rai et al. (2020)      | Predictive study.                                              |
| Zhao et al. (2020)     | The article did not evaluate COVID-19.                         |

168

### 169 *Characteristics of included articles*

170 The characteristics of the included studies are described in Table 3. All of them  
171 were retrospective observational studies that associated weather variables (temperature  
172 and humidity) with the spread of COVID-19.[9,20-35] Only two studies were also  
173 classified as prospective, as they both suggest future policies to prevent the spread of



174 COVID-19 through additional control with a new vaccine,[25] and the use of the best  
175 fitted predictive model of the climatic conditions of the next 12 days in 5 cities  
176 worldwide.[24] Two papers investigated the effect of temperature only on seasonal  
177 variability in transmission of COVID-19.[21,30] Fifteen articles evaluated the effect of  
178 the variables under study - temperature associated with humidity - in transmission of  
179 SARS-CoV-2.[9,20,22-29,31-35] Of these, six[20,23-25,27,32] studies evaluated another  
180 constant variable, not included in this systematic review, that did not demonstrate an  
181 important factor if modeled alone in the transmission of the virus, the wind speed. It was  
182 not the objective of this systematic review to verify or discuss the statistical parameters  
183 in the manuscript. Therefore, we decided to perform a narrative synthesis, risk of bias and  
184 a narrative grade of evidence of the results.

**Table 3.** Summary of the data from the studies included in this review.

| <b>Authors, year, location and type of study</b>                                | <b>Date of COVID-19 data collection</b>                             | <b>Date of meteorological data collection</b>                       | <b>Sample location</b>                   | <b>Weather variables</b>                                                                                                                                                                                                                                                                                                                           | <b>COVID-19 data sources</b>                                     | <b>Meteorological data sources</b>                                           | <b>Statistical analysis</b>      | <b>Main results</b>                                                                                                                                                                                                                                                                                                                                                     |
|---------------------------------------------------------------------------------|---------------------------------------------------------------------|---------------------------------------------------------------------|------------------------------------------|----------------------------------------------------------------------------------------------------------------------------------------------------------------------------------------------------------------------------------------------------------------------------------------------------------------------------------------------------|------------------------------------------------------------------|------------------------------------------------------------------------------|----------------------------------|-------------------------------------------------------------------------------------------------------------------------------------------------------------------------------------------------------------------------------------------------------------------------------------------------------------------------------------------------------------------------|
| Al-Rousan et al., 2020, Turkey, retrospective observational study.              | January 22 <sup>nd</sup> , 2020 to February 4 <sup>th</sup> , 2020. | January 22 <sup>nd</sup> , 2020 to February 4 <sup>th</sup> , 2020. | China                                    | Temperature (Kelvin) and relative humidity (%) at two meters above the ground, pressure at ground level (hPa), wind speed (m/s) and directions at 10 meters above the ground, rainfall rate (kg/m <sup>2</sup> ) snowfall rate in (kg/m <sup>2</sup> ), snow depth in meters, surface downward short-wave irradiation (watt hour/m <sup>2</sup> ). | Johns Hopkins University Coronavirus Resource - WHO, CDC, ECDPC. | GFS Web Service-NCEP                                                         | Pearson correlation coefficient. | Weather variables showed a small effect on coronavirus transmission and no correlation can be extracted between the impact of weather and confirmed cases in all provinces. In some provinces, temperature showed a positive correlation in relation to confirmed cases and humidity demonstrated a negative correlation. In other provinces, no correlation was found. |
| Araújo et al., 2020, Spain/Portugal/Finland, retrospective observational study. | March 8 <sup>th</sup> , 2020                                        | January to March, 2020.                                             | Regions with more than 5 positive cases. | Temperature (Celsius), precipitation (mm).                                                                                                                                                                                                                                                                                                         | Johns Hopkins University Coronavirus Resource - WHO.             | CHELSA (Climatologies at high resolution for the Earth's land surface areas) | Descriptive statistics.          | The virus favors cool and dry conditions and is largely absent under extremely cold and very hot and wet conditions. This informs planning for the timing and magnitude of the likely public interventions to mitigate the adverse consequences of the coronavirus on public health.                                                                                    |

|                                                                                      |                                                                  |                                                                  |                                             |                                                            |                                                       |                                                                                                                                                                                                |                                                                                |                                                                                                                                                                                                                                                                   |
|--------------------------------------------------------------------------------------|------------------------------------------------------------------|------------------------------------------------------------------|---------------------------------------------|------------------------------------------------------------|-------------------------------------------------------|------------------------------------------------------------------------------------------------------------------------------------------------------------------------------------------------|--------------------------------------------------------------------------------|-------------------------------------------------------------------------------------------------------------------------------------------------------------------------------------------------------------------------------------------------------------------|
| Bannister-Tyrrell et al., 2020, Australia/France, retrospective observational study. | Cases reported until February 29 <sup>th</sup> , 2020            | March 4 <sup>th</sup> , 2020.                                    | Countries with confirmed coronavirus cases. | Temperature                                                | Open-source line list of confirmed COVID-19.          | Climate Prediction Centre (NOAA/OAR/ESRL PSD, Boulder, Colorado, USA, <a href="https://www.esrl.noaa.gov/psd/">https://www.esrl.noaa.gov/psd/</a> , accessed March 4 <sup>th</sup> , 2020)     | Generalized linear regression framework, ratio tests, pseudo R-squared values. | There may be seasonal variability in transmission of SARS-CoV-2, but this analysis does not imply that temperature alone is a primary driver of COVID-19 transmission. The onset of warmer weather in the northern hemisphere may modestly reduce rate of spread. |
| Bhattacharjee, 2020, India, retrospective observational study.                       | January 20 <sup>th</sup> , 2020 to March 14 <sup>th</sup> , 2020 | January 20 <sup>th</sup> , 2020 to March 14 <sup>th</sup> , 2020 | China and Italy                             | Maximum temperature, relative humidity, highest wind speed | WHO website and Department of Civil Protection, Italy | Local Weather Forecast, News and Conditions   Weather UndergroundOnline. ( <a href="https://www.wunderground.com/">https://www.wunderground.com/</a> . Accessed: March 9 <sup>th</sup> , 2020) | Pearson's correlation coefficient.                                             | It has been found that the relationship between the effectiveness of virus and different environmental factors is not that strong. Hence, it can be concluded that the virus shows no sign as of now, to become dormant during summer days.                       |
| Bu et al., 2020, China, retrospective observational study.                           | Not reported                                                     | October 1 <sup>st</sup> to December 15 <sup>th</sup> , 2020.     | China                                       | Temperature, humidity.                                     | WHO website and other public sources.                 | Guangdong Meteorological Observation Data Center (Wuhan 2019-2020), National Climate Center of China Meteorological Administration (China), NOAA (global temperature).                         | Descriptive statistics.                                                        | Warm and dry weather is favorable to the survival of the virus with a temperature range of 13-24 °C, a humidity range of 50-80%, a precipitation of 30 mm/month or less. Cold air for more than a week has a significant inhibitory effect on SARS-CoV-2.         |

|                                                                              |                                                                     |                                                                     |                                                                                                                                                                                       |                                                             |                                                           |                                                                                                |                                                                                                                  |                                                                                                                                                                                                                                                                                                                                                                                                                                                                                                                                                                                                                                                                                                                                                               |
|------------------------------------------------------------------------------|---------------------------------------------------------------------|---------------------------------------------------------------------|---------------------------------------------------------------------------------------------------------------------------------------------------------------------------------------|-------------------------------------------------------------|-----------------------------------------------------------|------------------------------------------------------------------------------------------------|------------------------------------------------------------------------------------------------------------------|---------------------------------------------------------------------------------------------------------------------------------------------------------------------------------------------------------------------------------------------------------------------------------------------------------------------------------------------------------------------------------------------------------------------------------------------------------------------------------------------------------------------------------------------------------------------------------------------------------------------------------------------------------------------------------------------------------------------------------------------------------------|
| Bukhari et al., 2020, USA, retrospective observational study.                | March 19 <sup>th</sup> , 2020                                       | January 20 <sup>th</sup> , 2020 to March 19 <sup>th</sup> , 2020.   | Each country/state (where available).                                                                                                                                                 | Temperature, absolute and relative humidity, wind speed.    | Johns Hopkins University Coronavirus Resource Center-WHO. | 'Worldmet' library in R from January 20 <sup>th</sup> , 2020 to March 19 <sup>th</sup> , 2020. | Descriptive statistics.                                                                                          | Based on the current data on the spread of COVID-19, the authors hypothesize that the lower number of cases in tropical countries might be due to warm humid conditions, under which the spread of the virus might be slower than has been observed for other viruses.                                                                                                                                                                                                                                                                                                                                                                                                                                                                                        |
| Chen et al., 2020, China, retrospective and prospective observational study. | January 20 <sup>th</sup> , 2020 to March 11 <sup>th</sup> , 2020.   | January 20 <sup>th</sup> , 2020 to March 11 <sup>th</sup> , 2020.   | China, Italy, Japan and other countries. USA (New York), Canada (Toronto), Italy (Milan), France (Paris), Cologne (Germany) to predict daily COVID-19 case counts in the future days. | Air temperature, relative humidity, wind speed, visibility. | WHO, CDC, ECDPC, JCDCP, DXY-COVID-19-Data.                | Integrated Surface Database of USA National Centers for Environmental Information.             | Loess regression interpolation, single-factor non-linear regression modeling, Pearson's correlation coefficient. | Changes in a single weather factor, such as temperature or humidity, could not correlate with the case counts very well. On the other hand, several meteorological factors combined together could describe the epidemic trend much better than single-factor models. Significant impact of daily mean temperature on the daily confirmed new case counts 14 days later. It is supposed that a sufficient time delay between exposure and confirmation is crucial for weather to exhibit its effect. There are relatively narrow temperature and humidity ranges for SARS-CoV-2 spread, there is an optimal temperature for SARS-CoV-2 at 8.07 °C and most cities with high epidemic transmission of COVID-19 are located in the humidity range of 60% ~ 90%. |
| Gupta, 2020, India, retrospective observational study.                       | January 22 <sup>nd</sup> , 2020 to February 16 <sup>th</sup> , 2020 | February 1 <sup>st</sup> , 2020 to February 11 <sup>th</sup> , 2020 | China                                                                                                                                                                                 | Temperature and humidity                                    | John Hopkins University Coronavirus Resource - WHO.       | Climatic Research Unit                                                                         | Fixed Effects Model Regression with Robust Standard Errors.                                                      | The results suggest that temperature has a huge effect on how rapidly the SARS-CoV-2 spreads during certain conditions. The author recommends that southern hemisphere countries prepare for increasing caseload, and northern hemisphere countries limit air conditioning.                                                                                                                                                                                                                                                                                                                                                                                                                                                                                   |

|                                                                               |                                                                      |                                          |                                                 |                                                                       |                                                                                                                                       |                                                                                          |                                                                                                                    |                                                                                                                                                                                                                                                                                                                                                                                                                          |
|-------------------------------------------------------------------------------|----------------------------------------------------------------------|------------------------------------------|-------------------------------------------------|-----------------------------------------------------------------------|---------------------------------------------------------------------------------------------------------------------------------------|------------------------------------------------------------------------------------------|--------------------------------------------------------------------------------------------------------------------|--------------------------------------------------------------------------------------------------------------------------------------------------------------------------------------------------------------------------------------------------------------------------------------------------------------------------------------------------------------------------------------------------------------------------|
| Jiwei et al., 2020, China, retrospective and prospective observational study. | January 23 <sup>rd</sup> , 2020 to February 19 <sup>th</sup> , 2020. | Not reported                             | China                                           | Air index, temperature, precipitation, relative humidity, wind power. | CDC                                                                                                                                   | CMDC website                                                                             | Correlation analysis, linear regression.                                                                           | Higher temperature will reduce the spread of the virus. Precipitation shows low influence on COVID-19 spread. Higher relative humidity is the protection factor for the disease control.                                                                                                                                                                                                                                 |
| Khattabi et al., 2020, Morocco, retrospective observational study.            | March 17 <sup>th</sup> , 2020                                        | Not reported                             | All countries                                   | Temperature and relative humidity                                     | COVID-19 Coronavirus Outbreak ( <a href="https://www.worldometers.info/coronavirus/">https://www.worldometers.info/coronavirus/</a> ) | CLIMATE-DATA ( <a href="https://en.climate-data.org/">https://en.climate-data.org/</a> ) | Psychometric diagrams.                                                                                             | The COVID-19 has a greater impact in places where the weather is drier and colder than in places where the weather is wetter and warmer.                                                                                                                                                                                                                                                                                 |
| Luo et al., 2020, USA, retrospective observational study.                     | January 23 <sup>rd</sup> , 2020 to February 10 <sup>th</sup> , 2020. | January, 2020.                           | China, Thailand, Singapore, Japan, South Korea. | Temperature, absolute and relative humidity.                          | Johns Hopkins Center for Systems Science and System website- WHO, USCDPC, CDC, ECDPC, NHC, DXY-COVID-19-Data.                         | World Weather Online                                                                     | Proxy for the reproductive number R, Clausius Clapeyron equation, Loess regression, exponential fit, linear model. | Absolute humidity and temperature are associated with local exponential growth of COVID-19 across provinces in China and other affected countries. Absolute humidity and temperature yielded a positive relationship and a slight negative relationship respectively. Changes in weather alone will not necessarily lead to declines in case counts without the implementation of extensive public health interventions. |
| Oliveiros et al., 2020, Portugal, retrospective                               | January 23 <sup>rd</sup> , 2020 to March                             | January 23 <sup>rd</sup> , 2020 to March | China                                           | Temperature, humidity, precipitation, wind speed.                     | Not reported                                                                                                                          | Meteostat Application Programming Interface.                                             | Descriptive statistics, exponential model, linear regression                                                       | The doubling time correlates positively with temperature and inversely with humidity, suggesting that a decrease in the rate of progression of COVID-19 is likely with the arrival of spring and summer in the north                                                                                                                                                                                                     |



|                                                                   |                                                                      |                                                                                                          |                                                                                            |                                                                                     |                                                                                                                    |                  |                                                                                            |                                                                                                                                                                                                                                                                                                                                                                                                                                                                                                                                                                                                           |
|-------------------------------------------------------------------|----------------------------------------------------------------------|----------------------------------------------------------------------------------------------------------|--------------------------------------------------------------------------------------------|-------------------------------------------------------------------------------------|--------------------------------------------------------------------------------------------------------------------|------------------|--------------------------------------------------------------------------------------------|-----------------------------------------------------------------------------------------------------------------------------------------------------------------------------------------------------------------------------------------------------------------------------------------------------------------------------------------------------------------------------------------------------------------------------------------------------------------------------------------------------------------------------------------------------------------------------------------------------------|
| observational study.                                              | 1 <sup>st</sup> , 2020.                                              | 1 <sup>st</sup> , 2020.                                                                                  |                                                                                            |                                                                                     |                                                                                                                    |                  | model, two way ANOVA.                                                                      | hemisphere. These two variables contribute to a maximum of 18% of the variation, the remaining 82% being related to other factors such as containment measures, general health policies, population density, transportation, cultural aspects.                                                                                                                                                                                                                                                                                                                                                            |
| Poirier et al., 2020, USA, retrospective observational study.     | January 22 <sup>nd</sup> , 2020 to February 26 <sup>th</sup> , 2020. | January 17 <sup>th</sup> -31 <sup>st</sup> , 2020 and February 1 <sup>st</sup> -15 <sup>th</sup> , 2020. | China, Iran, Italy, Singapore, Japan, South Korea.                                         | Near-surface air temperature, absolute humidity (near-surface water vapor density). | Johns Hopkins Center for Systems Science and Engineering website- WHO, USCDCP, CDC, ECDPC, NHC, DXY-COVID-19-Data. | ERA5 reanalysis. | Proxy for the reproductive number R, linear model with the local Rproxy, Loess regression. | Temperature showed a negative relationship, indicating that higher temperatures appeared to have lower COVID-19 transmission. Absolute humidity showed a negative relationship, indicating that locations with higher absolute humidity experienced lower transmission. Changes in weather alone will not necessarily lead to declines in case count without the implementation of extensive public health interventions.                                                                                                                                                                                 |
| Sajadi et al., 2020, USA/Iran, retrospective observational study. | Not reported                                                         | Reanalysis data for 2019 and January-February 2020.                                                      | Country-wide (epicenters of disease): South Korea, Japan, Iran, Italy, USA, Spain, France. | Two-meter temperatures, relative humidity, specific humidity, absolute humidity.    | Johns Hopkins Center for Systems Science and Engineering.                                                          | ERA5 reanalysis. | Mann-Whitney and linear regression.                                                        | The combined profile of having low average temperatures and specific humidity tightly clusters all the cities with significant outbreaks as of March 10 <sup>th</sup> , 2020 compared to other cities without COVID-19 cases. The distribution of significant community outbreaks along restricted latitude, temperature, and humidity are consistent with the behavior of a seasonal respiratory virus. Using weather modeling, it may be possible to predict the regions most likely to be at higher risk of significant community spread of COVID-19 in the upcoming weeks, allowing for concentration |

|                                                                                                 |                                                                       |                                                                       |                                                                                             |                                          |                                                                                                                      |                                                           |                                                                                                                                                                                                     | of public health efforts on surveillance and containment.                                                                                                                                                                                                                                                                                                                                                                                            |
|-------------------------------------------------------------------------------------------------|-----------------------------------------------------------------------|-----------------------------------------------------------------------|---------------------------------------------------------------------------------------------|------------------------------------------|----------------------------------------------------------------------------------------------------------------------|-----------------------------------------------------------|-----------------------------------------------------------------------------------------------------------------------------------------------------------------------------------------------------|------------------------------------------------------------------------------------------------------------------------------------------------------------------------------------------------------------------------------------------------------------------------------------------------------------------------------------------------------------------------------------------------------------------------------------------------------|
| Shi et al., 2020, retrospective observational study.                                            | January 20 <sup>th</sup> , 2020 and February 29 <sup>th</sup> , 2020. | January 20 <sup>th</sup> , 2020 and February 29 <sup>th</sup> , 2020. | Thirty one provincial-level regions in mainland China and Wuhan city.                       | Daily temperatures and relative humidity | CNHC using the CoV2019 package ( <a href="http://www.nhc.gov.cn/">http://www.nhc.gov.cn/</a> )                       | Meteorological authority in mainland China.               | Clausius-Clapeyron relation equation, incidence and the common logarithm of numbers, weighted regression and smoothing scatterplot (LOESS), distributed lag nonlinear models (DLNMs), M-SEIR model. | Lower and higher temperatures might be positive to decrease the COVID-19 incidence. The COVID-19 outbreak would not last for a long period of time with the increase of temperature, but the scale of the outbreak would be influenced by the measures taken among countries.                                                                                                                                                                        |
| Wang et al., 2020, China, retrospective observational study (time-space cross-sectional study). | January 20 <sup>th</sup> , 2020 to February 4 <sup>th</sup> , 2020.   | January 1 <sup>st</sup> , 2020 to January 30 <sup>th</sup> , 2020.    | All cities and regions affected by COVID-19 in the world (China and 26 overseas countries). | Temperature                              | Official websites of the Health Commissions at all levels in China and the health authorities of overseas countries. | Meteorological authority in China and in other countries. | Descriptive statistics, Log-transformation, restricted cubic spline function, generalized linear mixture model.                                                                                     | Temperature has significant impact on the transmission of COVID-19. There might be a nonlinear dose-response relationship between the two, indicating that there is a best temperature contributing to its transmission and that low temperature is beneficial to the viral transmission. For countries and regions with a lower temperature, strict prevention and control measures should be continued to prevent future reversal of the epidemic. |
| Wang et al., 2020, China, retrospective                                                         | Before January                                                        | January 21 <sup>st</sup> , 2020 to                                    | China                                                                                       | Temperature, relative humidity.          | CDC                                                                                                                  | 699 meteorological stations in China                      | Weibull distribution using the                                                                                                                                                                      | High temperature and high relative humidity significantly reduce the transmission of COVID-19, respectively, even after controlling for                                                                                                                                                                                                                                                                                                              |

|                      |                             |                                        |                                                                                                    |                                                                                                                        |                                                                                                                                                                                               |
|----------------------|-----------------------------|----------------------------------------|----------------------------------------------------------------------------------------------------|------------------------------------------------------------------------------------------------------------------------|-----------------------------------------------------------------------------------------------------------------------------------------------------------------------------------------------|
| observational study. | 24 <sup>th</sup> ,<br>2020. | January<br>23 <sup>rd</sup> ,<br>2020. | (if a city does not have a meteorological station inside it, the closest station is used instead). | Maximum Likelihood Estimation (MLE) method, daily effective reproductive number R, Ordinary Least Square (OLS) method. | population density and GDP per capita of cities. It indicates that the arrival of summer and rainy season in the northern hemisphere can effectively reduce the transmission of the COVID-19. |
|----------------------|-----------------------------|----------------------------------------|----------------------------------------------------------------------------------------------------|------------------------------------------------------------------------------------------------------------------------|-----------------------------------------------------------------------------------------------------------------------------------------------------------------------------------------------|

WHO – World Health Organization; CDC – Chinese Center for Disease Control and Prevention; ECDPC – European Centre for Disease Prevention and Control; GFS – Global Forecast System; NCEP – National Centers for Environmental Prediction; NOAA – USA National Center for Environmental Forecasting; USA - United States of America; JCDPC – Japan Center for Disease Control and Prevention; DXY-COVID-19-Data – Chinese website that aggregates national and local CDC situation reports; CMCD – China Meteorological Data Service Center; USCDCP – U.S. Centers for Disease Control and Prevention; NHC – Chinese National Health Center; ERA5 reanalysis - a state-of-the-art data product produced at the European Centre for Medium-Range Weather Forecasts.

Great heterogeneity was observed in relation to the displayed variables, that included other weather conditions beyond temperature and humidity[9,20-31] like wind speed,[20,32] visibility,[24] precipitation,[25,27] pressure,[20] rainfall rate,[20] snowfall rate,[20] snow depth,[20] surface downward short-wave irradiation.[20] A heterogeneity was also observed regarding the date of data collection, both in relation to the location studied, and the date of epidemiological data collection of COVID-19 and climatic conditions.

### *Results of Individual Studies*

Great homogeneity was observed in the results of the effect of temperature and humidity in the seasonal variability and spread of the virus. Sixteen articles selected for final analysis[9,20-30,33-35] were unanimous in stating that cool and dry conditions were potentiating factors for the spread of COVID-19, with the spread being largely absent under extremely cold and very hot and wet conditions. Only one article reported no strong effect of temperature and humidity in the spread of the virus.[32]

It was also noticed that several meteorological factors combined could better describe the epidemic trend than when a single variable was analyzed.[21,24] In addition, confounding factors as public health policies on surveillance and containment, social isolation campaigns (home quarantine strategy), including with patients' families, socio-economic development contributes to controlling the spread of the virus around the world.[9,20,23-29,31,33,35] Moreover, controlling population density (less crowded cities)[30] and movement,[24] travel limitations,[26,28] increasing the number of medical staff and hospitals, isolating all the suspected cases, understanding the method of each patient's infection, combining the medical history of the patients with current diagnosis to extract information about the virus,[20] are important measures to combat the new coronavirus.

It was verified, in countries with virus transmission under control like Korea, that the widespread testing to identify potential COVID-19 positive subjects, including asymptomatic ones, could reduce transmission.[23]

Regarding the review process, ten of the selected articles have not yet gone through the peer review process. This must be taken into consideration when making any inference from their conclusion.[9,20-22,24,26-28,31,35]

After considering all these factors, we can infer that confounding variables play an important role, even more significant than temperature and relative humidity, in the spread of COVID-19.

### *Synthesis of Results*

A meta-analysis was not performed due to the heterogeneity of the methods, locations, and information provided in the related articles investigating the proposed objectives. Additionally, differing units of measure, variables and statistical methods did not allow meaningful comparisons. Only simple and descriptive comparisons were reported, beyond the risk of bias and narrative grade of evidence of the results.

### *Risk of Bias Assessment*

The risk of bias ranged from high in four papers[9,22,27,32] to moderate in the remaining thirteen (Table 4).[20,21,23-26,28-31,33-35] Limitations were observed in the main items evaluated. Inability to satisfy “the criteria for inclusion in the sample” and “the study subjects and the setting described” items resulted in the low grade, since a limitation in the sample selection criteria meant that none of the studies received a positive evaluation. In addition, many “confounding factors” like public health interventions by the government can interfere with the real effect of the variables studied - temperature and humidity - on the spread of the virus. These factors were only identified in five of the thirteen selected articles.[25,27,28,31,33] In contrast, the items “the exposure measured”, “the outcomes measured” and “the objective, the standard criteria used for measurement of the condition” were, in most articles, performed in a valid and reliable way, except for Oliveiros[27] in all of these three items, Bhattacharjee[32] and Araújo[9] in item “the outcomes measured”, Al-Rousan[20] and Bannister-Tyrrell[21] regarding item “the objective, the standard criteria used for measurement of the condition”.



**Table 4.** Risk of bias assessment of the studies included in the review.

| Questions/Author                                                            | Al-Rousan, 2020 | Araújo, 2020 | Bhattacharjee, 2020 | Bannister-Tyrrell, 2020 | Bu, 2020 | Bukhari, 2020 | Chen, 2020 | Gupta, 2020 | Jiwei, 2020 | Khattabi, 2020 | Luo, 2020 | Oliveiros, 2020 | Poirier, 2020 | Sajadi, 2020 | Shi, 2020 | Wang, 2020 | Wang, 2020 |
|-----------------------------------------------------------------------------|-----------------|--------------|---------------------|-------------------------|----------|---------------|------------|-------------|-------------|----------------|-----------|-----------------|---------------|--------------|-----------|------------|------------|
| 1. Were the criteria for inclusion in the sample clearly defined?           | No              | No           | No                  | No                      | No       | No            | No         | No          | No          | No             | No        | No              | No            | No           | No        | No         | No         |
| 2. Were the study subjects and the setting described in detail?             | No              | No           | No                  | No                      | No       | No            | No         | No          | No          | No             | No        | No              | No            | No           | No        | No         | No         |
| 3. Was the exposure measured in a valid and reliable way?                   | Yes             | Yes          | Yes                 | Yes                     | Yes      | Yes           | Yes        | Yes         | Yes         | Yes            | Yes       | No              | Yes           | Yes          | Yes       | Yes        | Yes        |
| 4. Were objective, standard criteria used for measurement of the condition? | No              | Yes          | Yes                 | No                      | Yes      | Yes           | Yes        | Yes         | Yes         | Yes            | Yes       | No              | Yes           | Yes          | Yes       | Yes        | Yes        |
| 5. Were confounding factors identified?                                     | No              | No           | No                  | No                      | No       | No            | No         | Yes         | Yes         | No             | No        | Yes             | Yes           | No           | No        | No         | Yes        |
| 6. Were strategies to deal with confounding factors stated?                 | Yes             | No           | No                  | Yes                     | No       | No            | No         | Yes         | Yes         | No             | No        | Yes             | Yes           | No           | Yes       | No         | Yes        |

|                                                            |      |      |      |      |      |      |      |      |      |      |      |      |      |      |      |      |      |      |
|------------------------------------------------------------|------|------|------|------|------|------|------|------|------|------|------|------|------|------|------|------|------|------|
| 7. Were the outcomes measured in a valid and reliable way? | Yes  | No   | No   | Yes  | Yes  | Yes  | Yes  | Yes  | Yes  | Yes  | Yes  | Yes  | No   | Yes  | Yes  | Yes  | Yes  | Yes  |
| 8. Was appropriate statistical analysis used?              | Yes  | No   | Yes  | Yes  | No   | Yes  | Yes  | Yes  | Yes  | Yes  | Yes  | Yes  | Yes  | Yes  | Yes  | Yes  | Yes  | Yes  |
| Risk of Bias                                               | Mod. | High | High | Mod. | High | Mod. | Mod. | Mod. | Mod. | Mod. | Mod. | Mod. | High | Mod. | Mod. | Mod. | Mod. | Mod. |

### *Level of Evidence*

The evaluation of the certainty of the evidence according to GRADE is described in Table 5. The level of certainty of outcomes evaluated in this systematic review – “Association between temperature and spread rate of COVID-19” and “Association between humidity and spread rate of COVID-19” – were classified as “low”. Since the studies are observational and presented a considerable risk of bias, the certainty of the evidence generated received this classification. Moreover, one study did not show a significant effect of the variables under study on the spread of the new coronavirus.[32]

**Table 5.** Narrative GRADE evidence profile table.

| Outcomes                                                    | Impact                                                                                                                                                                                                                                                                                                                                                                                                                                                                               | N° of Studies                    | Certainty of the evidence (GRADE) |
|-------------------------------------------------------------|--------------------------------------------------------------------------------------------------------------------------------------------------------------------------------------------------------------------------------------------------------------------------------------------------------------------------------------------------------------------------------------------------------------------------------------------------------------------------------------|----------------------------------|-----------------------------------|
| Association between temperature and spread rate of COVID-19 | Of the seventeen articles evaluated, sixteen showed some effect of temperature on the transmission rate. Except for one, which concluded that temperature has no effect on SARS-CoV-2 transmission, the other sixteen found that warmer climates are less likely to spread the virus. When other variables are included in the analysis, such as migration patterns, public isolation policies, population density, and cultural aspects, the temperature seems to have less impact. | (17<br>OBSERVATIONAL<br>STUDIES) | ⊕⊕○○<br>LOW <sup>a</sup>          |
| Association between humidity and spread rate of COVID-19    | Fourteen manuscripts that investigated the effect of humidity on the transmission of SARS-CoV-2 demonstrated an association between variables. Only one article reported no effect of humidity on the spread of the virus, while the other fourteen showed that wetter climates inhibit the virus spread. As with the temperature, the adjustment for confounding factors decreases the impact of humidity on the transmission of COVID-19.                                          | (15<br>OBSERVATIONAL<br>STUDIES) | ⊕⊕○○<br>LOW <sup>a</sup>          |

a. The studies used secondary data obtained through websites for both the number of infected and the climatic conditions. Therefore, eligibility criteria to control possible confounding factors have not been adopted. Furthermore, several studies did not consider variables such as migration patterns and isolation policies in their results, factors that directly impact on the spread rate of SARS-CoV-2/COVID-19.

## Discussion

The results of the articles included in this systematic review indicate that the spread of COVID-19 may be influenced by climatic variables such as temperature and humidity. Apparently, warmer and humid climates may show less transmission of the SARS-CoV-2 virus. Although the level of evidence generated was low, due to the observational design of the studies and the inherent risk of bias, overall great homogeneity of the results was observed among the included studies.

Furthermore, the spread of types of diseases caused by betacoronavirus, such as SARS-CoV-1[11] and MERS-CoV,[36] have already been shown to suffer the impact of climatic conditions. In both these coronaviruses, hot and humid climates demonstrated the ability to decrease the viability of these viruses, while in places with low temperature and humidity there was greater viral stability.

### *Summary of evidence*

Seventeen articles were included in this systematic review, and methodological issues were identified. Regarding the classification of the articles and their score evaluated by the JBI Critical Appraisal Checklist tool,[18] thirteen studies were classified as moderate risk of bias,[20,21,23-26,28-31,33-35] and four as high risk of bias.[9,22,27,32] This was due, among other factors, to limitations in the sample selection criteria, once the main items “the criteria for inclusion in the sample” and “the study subjects and the setting described” received a negative rating in all selected articles. A reasonable explanation for this fact would be that due to the urgency of the world situation with the rapid spread of COVID-19 worldwide and the need to search for immediate responses to contain the pandemic, secondary data available was used at the moment that the studies were realized, both in relation to the epidemiology of the new coronavirus, and to the climatic conditions, in an attempt to verify a possible association between them. Because of this, there was a limitation in the sample selection criteria and the confounding factors that could interfere with the analysis of these secondary data were not controlled by the eligibility criteria.

The quality of evidence of clinical outcomes was also graded using the GRADE tool. The evidence was scored as low because of the study designs, classified as observational cross-sectional studies, due to the effect of other confounding variables on temperature and humidity in the spread of the virus, and because one selected article did not find a positive strong association between the spread of the new coronavirus with temperature and humidity. According to the author, the results found no strong



relationship between the effectiveness of virus and different environmental factors.[32] However, due to homogeneity in the results, which indicate, in summary, that cool and dry conditions were potential factors to the spread of COVID-19, and warmer and wetter climates are less likely to enhance the transmissibility of the virus, the level of evidence could not be rated lower than that.

The analyses of COVID-19 outbreaks in relation to meteorology aspects reveal significant correlations between the incidence of positive cases and climatic conditions. Social factors in combination with meteorological factors play a role in coronavirus outbreaks.[37,38] In fifteen included studies,[9,20,22-30,32-35] the authors investigate the association between temperature and humidity in the transmission rate of COVID-19. In the other two articles,[21,31] the association was made only with temperature.

Luo et al.[26] suggested that sustained transmission and rapid (exponential) growth of cases are possible over a range of humidity and temperature conditions. Bu et al.[22] concluded that a temperature range of 13~19°C and humidity of 50% ~ 80% are suitable for the survival and transmission of COVID-19. Moreover, Wang et al.[31] have support the role that temperature could have in changing the COVID-19 human-to-human transmission and that there might be an optimal temperature for the viral transmission. They suggested that colder regions in the world should adopt the strictest social control measures, since low temperatures significantly contribute to the viability, transmission rate and survival of coronaviruses. Finally, Kathabbi et al.[34] stated that by air quality analysis in areas highly contaminated by the virus, the population could be informed and be encouraged to avoid this area, creating a microclimate that helps to eliminate the spread of COVID-19.

Araújo et al.[9] made it clear that it is not possible to characterize the exact local temperature and humidity conditions that minimizing the virus spread. On the contrary, it is reasonable to determine the type of macroclimate conditions in the places where transmission is occurring. For example, in the tropics, where high temperatures and humidity characterize the weather, the climatic suitability for spread of COVID-19 seems to be more difficult. Heat intolerance of the virus is probably related to the breakdown of their lipid bilayer,[39] in a similar model to what occurs with the predecessor of the new coronavirus, the SARS-CoV.[40] Speculative explanation also based on patterns observed for other SARS-CoV justifies the effect of humidity on the less effective spread of the virus on the environment, which reduces the total indirect and secondary transmission.[41] Although higher humidity may increase the atmospheric suspended

matter,[22] the amount of virus deposited on surfaces, and virus survival time in droplets on surfaces,[41] the reduction of the virus spread by indirect air transmission may be an important factor behind the reduced spreading of COVID-19 in a humid climate.

High temperature and high humidity reduce the transmission of others infections of the respiratory tract, like influenza[42,43] and of SARS coronavirus.[11,38] The main reasons are: the virus is more stable in cold temperatures, and respiratory droplets, as containers of viruses, remain in suspension longer in dry air.[44] Cold and dry weather can also demote the hosts' immunity and make them more susceptible to the virus.[45]

Many respiratory pathogens show seasonality and the human activity patterns and immunity can be influenced by environmental factors limited during the COVID-19 outbreak, due to the absence of extreme climatic conditions and specific immunity for a newly emerging virus.[35] Cold air temperature contributes to spread of viruses, including coronavirus, and the possibility of infection. Some possible reasons are: low temperature provides suitable survival and reproduction conditions for coronavirus;[46] cold air causes vasoconstriction of the respiratory tract which contributes to weakening of the immune system; and dry cold air makes the nasal mucosa prone to small ruptures, thereby creating opportunities for virus invasion.[47] In contrast, a long period of low or extremely cold temperature played a positive role in reducing the transmission of the coronavirus.[9,22]

In addition, Bukhari et al.[23] discuss another hypothesis for the lower number of COVID-19 cases detected in the tropics. It could be due to less mass testing as many of the underdeveloped countries that presents deficiency in the health care system and may have not done enough testing to detect the actual spread of this virus.

Two of the articles were classified as retrospective and prospective [24,25] since they suggest implementing future public policies and mass actions that aim to control the spread of COVID-19 around the world. Chen et al.[24] proposed a daily predictive model that in combination with weather observations in the previous 14 days, for five high-latitude cities (New York, Toronto, Italy, Paris and Cologne), is able to predict daily new case counts of COVID-19 for the following 12 days in these places. It is important to notice that a single weather factor alone could not affect the virus transmission too much. However the combination of different meteorological variables could fit a more complex model, in order to address the systematic influence of different types of weather data on the spread of the virus. Jiwei et al.[25] verified further control with specific medicines and an effective vaccine. Considering the practice of social isolation, the process of this

strategy is considered a short-time vaccine for susceptible populations in helping to control the disease.

According to Oliveiros et al.,[27] temperature and humidity contribute to a maximum of 18% of the variation, the remaining 82% being related to other factors such as containment measures, general health policies, population density, transportation, and cultural aspects. Population migration is another key factor in the spread process that cannot be ignored,[25] as well as community structure, social dynamics, and global connectivity.[23] In cities with higher levels of population density, the virus is expected to spread faster than that in less crowded cities.[30]

Al-Rousan et al.[20] suggested that international governments should adopt rigorous public policies. This can be done by increasing the number of health professionals and hospitals, and socially isolating mainly the suspected cases. Better health care facilities tend to reduce the transmission of COVID-19.[30] The relatively fast outbreak, associated with imperfect daily reporting practices, make a vast underreporting of new cases of COVID-19. Travel limitations and other control interventions need to be implemented consistently.[28] Additionally, Gupta[33] recommended that all citizens be required to wear a face mask whenever they go out, because the primarily viral infection is through airborne or close contact. The Chinese government used this as a key tool in managing the disease, especially with asymptomatic infected people.

Finally, the review process of the selected articles should be evaluated with caution. Ten of the included studies in this systematic review have not yet gone through the peer review process, which must be taken into consideration when making any inference from the authors' conclusion.[9,20-22,24,26-28,31,35]

The results of this systematic review indicate that the confounding variables, together, are even more significant than temperature and relative humidity. The timing, implementation, and magnitude of the likely public interventions from international governments should reduce the adverse consequences of COVID-19 on the public health system. Only with proper planning will unnecessary damage be avoided for individuals and the global economy.

#### *Limitations*

The eligibility criteria adopted in the selection of participants were not clear in all included articles. It was only reported that the number of individuals diagnosed with COVID-19 was obtained through secondary data available on websites. In addition, several manuscripts did not go through peer review,[9,20-24,26-28,31,35] due to the

urgency of publication on the topic, so care should be taken when considering the results of these studies, although they point in the same direction of effect and impact. Furthermore, some studies[9,20-24,26,29,30] have not evaluated possible confounding factors that could influence the impact of climatic variables on the spread of COVID-19, such as migration patterns, containment measures, general health policies, population density, herd immunity, transportation, and cultural aspects. The articles that included these variables in their analysis[25,27,28,31] concluded that climate alone does not explain most of the variability in the spread of the disease.

## **Conclusion**

Considering the existing scientific evidence, the spread of COVID-19 seems to be lower in warm and wet climates. However, the certainty of the evidence generated was graded as low. Furthermore, temperature and humidity alone do not explain most of the variability of the COVID-19 outbreak. Public isolation policies, herd immunity, migration patterns, population density, and cultural aspects might directly influence how the spread of this disease occurs.

## **References**

- 1 Mourtzoukou EG, Falagas ME. Exposure to cold and respiratory tract infections. *Int J Tuberc Lung Dis.* 2007;11: 938-43.
- 2 Human Coronavirus. In Types Centers for Disease Control and Prevention. 2020 [cited 2020 March 24]. Available from: <https://www.cdc.gov/coronavirus/types.html>
- 3 International Committee on Taxonomy of Viruses. 2020. Available from: <https://talk.ictvonline.org/?Redirected=true>.
- 4 Wu F, Zhao S, Yu B, et al. A new coronavirus associated with human respiratory disease in China. *Nature.* 2020;579: 265-9.
- 5 Zhou P, Yang XL, Wang XG, et al. A pneumonia outbreak associated with a new coronavirus of probable bat origin. *Nature.* 2020;579: 270-3.
- 6 Callaway E. Time to use the p-word? Coronavirus enters dangerous new phase. 2020 [cited 2020 March 24]. Available from: <https://www.nature.com/articles/d41586-020-00551-1>.
- 7 Li Q, Guan X, Wu P, et al. Early transmission dynamics in Wuhan, China, of novel coronavirus-infected pneumonia. *N Engl J Med.* 2020;382: 1199-207.

- 8 Andersen KGR, A.; Lipkin, W.L.; Holmes, E.C.; Garry, R.F. The proximal origin of SARS-CoV-2. 2020 [cited 2020 March 24]. Available from: <http://virological.org/t/the-proximal-origin-of-sars-cov-2/398>
- 9 Araújo MB, Naimi B. Spread of SARS-CoV-2 Coronavirus likely to be constrained by climate. medRxiv:20034728v1 [Preprint]. 2020 [cited 2020 March 24]. Available from: <https://www.medrxiv.org/content/10.1101/2020.03.12.20034728v1.full.pdf>  
[doi.org/10.1101/2020.03.12.20034728](https://doi.org/10.1101/2020.03.12.20034728).
- 10 Coronavirus Resource Center. 2020 [accessed 2020 March 24]. Available from: <https://coronavirus.jhu.edu/>
- 11 Chan KH, Peiris JS, Lam SY, Poon LL, Yuen KY, Seto WH. The effects of temperature and relative humidity on the viability of the SARS coronavirus. *Adv Virol.* 2011;2011: 734690.
- 12 Dalziel BD, Kissler S, Gog JR, et al. Urbanization and humidity shape the intensity of influenza epidemics in U.S. cities. *Science.* 2018;362: 75-9.
- 13 Hemmes JH, Winkler KC, Kool SM. Virus survival as a seasonal factor in influenza and poliomyelitis. *Antonie van Leeuwenhoek.* 1962;28: 221-33.
- 14 Dowell SF, Ho MS. Seasonality of infectious diseases and severe acute respiratory syndrome-what we don't know can hurt us. *Lancet Infect Dis.* 2004;4: 704-8.
- 15 Moriyama M, Hugentobler WJ, Iwasaki A. Seasonality of respiratory viral infections. *Annu Rev Virol.* 2020.
- 16 WHO Director-General's opening remarks at the media briefing on COVID-19 - 11 March 2020. 2020. Available from: <https://www.who.int/dg/speeches/detail/who-director-general-s-opening-remarks-at-the-media-briefing-on-covid-19---11-march-2020> [cited 2020 March 29].
- 17 Moher D, Liberati A, Tetzlaff J, Altman DG. Preferred reporting items for systematic reviews and meta-analyses: the PRISMA statement. *PLoS Med.* 2009;6: e1000097.
- 18 Moola S, Munn Z, Tufanaru C, et al. Chapter 7: Systematic reviews of etiology and risk. 2017: 2019-05.
- 19 Balshem H, Helfand M, Schunemann HJ, et al. GRADE guidelines: 3. Rating the quality of evidence. *J Clin Epidemiol.* 2011;64: 401-6.
- 20 Al-Rousan N, Al-Najjar H. Nowcasting and forecasting the spreading of novel coronavirus 2019-nCoV and its association with weather variables in 30 Chinese

Provinces: A case study. SRRN [Preprint]. 2020 [cited 2020 March 24]. Available from: <https://ssrn.com/abstract=3537084> [dx.doi.org/10.2139/ssrn.3537084](https://doi.org/10.2139/ssrn.3537084).

21 Bannister-Tyrrell M, Meyer A, Faverjon C, Cameron A. Preliminary evidence that higher temperatures are associated with lower incidence of COVID-19, for cases reported globally up to 29th February 2020. medRxiv:20036731v1 [Preprint]. 2020 [cited 2020 March 24]. Available from: <https://www.medrxiv.org/content/10.1101/2020.03.18.20036731v1> [doi.org/10.1101/2020.03.18.20036731](https://doi.org/10.1101/2020.03.18.20036731).

22 Bu J, Peng D, Xiao H, et al. Analysis of meteorological conditions and prediction of epidemic trend of 2019-nCoV infection in 2020. medRxiv: 20022715v1 [Preprint]. 2020 [cited 2020 March 24]. Available from: <https://www.medrxiv.org/content/10.1101/2020.02.13.20022715v1> [doi.org/10.1101/2020.02.13.20022715](https://doi.org/10.1101/2020.02.13.20022715).

23 Bukhari Q, Jameel Y. Will coronavirus pandemic diminish by summer? SRRN. 2020 [cited 2020 March 24]. Available from: <https://ssrn.com/abstract=3558757> [dx.doi.org/10.2139/ssrn.3556998](https://doi.org/10.2139/ssrn.3556998).

24 Chen B, Liang H, Yuan X, et al. Roles of meteorological conditions in COVID-19 transmission on a worldwide scale. medRxiv:20037168v1 [Preprint]. 2020 [cited 2020 March 24]. Available from: <https://www.medrxiv.org/content/10.1101/2020.03.16.20037168v1> [doi.org/10.1101/2020.03.16.20037168](https://doi.org/10.1101/2020.03.16.20037168).

25 Jia J, Ding J, Liu S, et al. Modeling the control of COVID-19: Impact of policy interventions and meteorological factors. Cornell University. 2020.

26 Luo W, Majumder MS, Liu D, et al. The role of absolute humidity on transmission rates of the COVID-19 outbreak. medRxiv: 20022467v1 [Preprint]. 2020 [cited 2020 March 24]. Available from: <https://www.medrxiv.org/content/10.1101/2020.02.12.20022467v1> [doi.org/10.1101/2020.02.12.20022467](https://doi.org/10.1101/2020.02.12.20022467).

27 Oliveiros B, Caramelo L, Ferreira NC, Caramelo F. Role of temperature and humidity in the modulation of the doubling time of COVID-19 cases. medRxiv: 20031872v1 [Preprint]. 2020 [cited 2020 March 24]. Available from: <https://www.medrxiv.org/content/10.1101/2020.03.05.20031872v1> [doi.org/10.1101/2020.03.05.20031872](https://doi.org/10.1101/2020.03.05.20031872).

- 28 Poirier C, Luo W, Majumder M, et al. The role of environmental factors on transmission rates of the COVID-19 outbreak: An initial assessment in two spatial scales. SRRN. [Preprint]. 2020 [cited 2020 March 24]. Available from: [https://papers.ssrn.com/sol3/papers.cfm?abstract\\_id=3552677](https://papers.ssrn.com/sol3/papers.cfm?abstract_id=3552677)  
[dx.doi.org/10.2139/ssrn.3552677](https://doi.org/10.2139/ssrn.3552677).
- 29 Sajadi M, Habibzadeh P, Vintzileos A, Shokouhi S, Miralles-Wilhelm F, Amoroso A. Temperature, humidity and latitude analysis to predict potential spread and seasonality for COVID-19. SRRN. 2020 [cited 2020 March 24]. Available from: [https://papers.ssrn.com/sol3/papers.cfm?abstract\\_id=3550308](https://papers.ssrn.com/sol3/papers.cfm?abstract_id=3550308)  
[dx.doi.org/10.2139/ssrn.3550308](https://doi.org/10.2139/ssrn.3550308).
- 30 Wang J, Tang K, Feng K, Lv W. High Temperature and high humidity reduce the transmission of COVID-19. SRRN. 2020 [cited 2020 March 24]. Available from: [https://papers.ssrn.com/sol3/papers.cfm?abstract\\_id=3551767](https://papers.ssrn.com/sol3/papers.cfm?abstract_id=3551767)  
[dx.doi.org/10.2139/ssrn.3551767](https://doi.org/10.2139/ssrn.3551767).
- 31 Wang M, Jiang A, Gong L, et al. Temperature significant change COVID-19 Transmission in 429 cities. medRxiv: 20025791v1 [Preprint]. 2020 [cited 2020 March 24]. Available from: <https://www.medrxiv.org/content/10.1101/2020.02.22.20025791v1.full.pdf>  
[doi.org/10.1101/2020.02.22.20025791](https://doi.org/10.1101/2020.02.22.20025791).
- 32 Bhattacharjee S. Statistical investigation of relationship between spread of coronavirus disease (COVID-19) and environmental factors based on study of four mostly affected places of China and five mostly affected places of Italy. Cornell University. 2020.
- 33 Gupta D. Effect of ambient temperature on COVID-19 infection rate. SRRN. 2020 [cited 2020 March 24]. Available from: [https://papers.ssrn.com/sol3/papers.cfm?abstract\\_id=3558470](https://papers.ssrn.com/sol3/papers.cfm?abstract_id=3558470)  
[dx.doi.org/10.2139/ssrn.3558470](https://doi.org/10.2139/ssrn.3558470).
- 34 Khattabi E, Zouini M, Jamil M. The thermal constituting of the air provoking the spread of (COVID-19). SRRN. 2020 [cited 2020 March 24]. Available from: [https://papers.ssrn.com/sol3/papers.cfm?abstract\\_id=3560374](https://papers.ssrn.com/sol3/papers.cfm?abstract_id=3560374)  
[dx.doi.org/10.2139/ssrn.3560374](https://doi.org/10.2139/ssrn.3560374).
35. Shi P, Dong Y, Yan H, et al. The impact of temperature and absolute humidity on the coronavirus disease 2019 (COVID-19) outbreak - evidence from China. medRxiv: 20025791v1 [Preprint]. 2020 [cited 2020 March 24]. Available from:



<https://www.medrxiv.org/content/10.1101/2020.03.22.20038919v1>

[doi.org/10.1101/2020.03.22.20038919](https://doi.org/10.1101/2020.03.22.20038919).

36. Altamimi A, Ahmed AE. Climate factors and incidence of Middle East Respiratory Syndrome coronavirus. *J Infect Public Health*. 2019.
37. Yip C, Chang WL, Yeung KH, Yu IT. Possible meteorological influence on the severe acute respiratory syndrome (SARS) community outbreak at Amoy Gardens, Hong Kong. *J Environ Health*. 2007;70: 39-46.
38. Yuan J, Yun H, Lan W, et al. A climatologic investigation of the SARS-CoV outbreak in Beijing, China. *Am J Infect Control*. 2006;34: 234-6.
39. Raamsman MJB, Locker JK, de Hooze A, et al. Characterization of the Coronavirus Mouse Hepatitis Virus Strain A59 Small Membrane Protein E. *J Virol*. 2000;74: 2333-42.
40. Schoeman D, Fielding BC. Coronavirus envelope protein: current knowledge. *Virol J*. 2019;16: 69.
41. Paynter S. Humidity and respiratory virus transmission in tropical and temperate settings. *Epidemiol Infect*. 2015;143: 1110-8.
42. Park J-E, Son W-S, Ryu Y, Choi SB, Kwon O, Ahn I. Effects of temperature, humidity, and diurnal temperature range on influenza incidence in a temperate region. *Influenza Other Respir Viruses*. 2020;14: 11-18.
43. Steel J, Palese P, Lowen AC. Transmission of a 2009 pandemic influenza virus shows a sensitivity to temperature and humidity similar to that of an H3N2 seasonal strain. *J Virol*. 2011;85: 1400-2.
44. Lowen AC, Steel J. Roles of humidity and temperature in shaping influenza seasonality. *J Virol*. 2014;88: 7692-5.
45. Kudo E, Song E, Yockey LJ, et al. Low ambient humidity impairs barrier function and innate resistance against influenza infection. *Proc Natl Acad Sci USA*. 2019;116: 10905-10.
46. J. W. Health · Environment · Weather Beijing. Meteorological Press. 1992; 89.
47. Zhou ZX, Jiang CQ. Effect of environment and occupational hygiene factors of hospital infection on SARS outbreak. *Zhonghua Lao Dong Wei Sheng Zhi Ye Bing Za Zhi*. 2004;22: 261-3.
